# Supplementary material
Source: PubMed Central journal article supplement (PMC7065487)
Supplement: baADV2019000753-suppl1.pdf [file baADV2019000753-suppl1.pdf]

**Supplemental Data:**

**Title: Human megakaryocytic microparticles induce de novo platelet biogenesis in a wild-type murine model**

Christian Escobar<sup>3</sup>, Chen-Yuan Kao,<sup>1,2</sup> Samik Das<sup>1,2</sup> and Eleftherios T. Papoutsakis<sup>1,2,3</sup>

<sup>1</sup>Department of Chemical and Biomolecular Engineering, <sup>2</sup>Delaware Biotechnology Institute and

<sup>3</sup>Department of Biological Sciences, University of Delaware, Newark, DE 19711

**Corresponding Author:** Eleftherios Terry Papoutsakis

**Address:** 15 Innovation Way, Delaware Biotechnology Institute, Newark, DE 19711

**Email:** epaps@udel.edu **Telephone:** 302-831-8376 **Fax:** 302-831-4841

**Supplementary Data included:**

1. Supplemental Materials and Methods
2. Supplemental Figures: 3
3. Supplemental References: 3

## **Supplemental Materials and Methods**

### ***Chemicals and Reagents***

Recombinant human interleukin 3 (IL-3), IL-6, IL-9, IL-11, stem cell factor (SCF), and thrombopoietin (TPO) were purchased from PeproTech Inc. BIT 9500 was purchased from Stemcell Tech. Anti-CD61 magnetic microbeads, MACS cell-separation tools, pre-separation filter, and lineage depletion kit were purchased from Miltenyi. RPMI 1640X, Antibiotic-Antimycotic were purchased from Thermo Fisher Scientific. LEAF rat anti-mouse CD41 antibody was purchased from Biolegend. Retic-Count kit was purchased from BD bioscience. All other chemicals were purchased from Sigma-Aldrich.

### ***In vitro human megakaryocyte (Mk) culture derived from mobilized peripheral blood (MPB)***

#### ***CD34<sup>+</sup> HSPCs***

CD34<sup>+</sup> cell-derived Mks were cultured as described<sup>1</sup>. Brief, frozen G-CSF-mobilized human peripheral blood CD34<sup>+</sup> cells (Fred Hutchinson Cancer Research Center) were cultured in megakaryocytic lineage growth media (Iscove modified Dulbecco medium, IMDM, Gibco) supplemented with 20% BIT 9500 (Stemcell Tech.), 100 ng/mL TPO, 100 ng/mL stem cell factor (SCF), 2.5 ng/mL interleukin-3 (IL-3), 10 ng/mL IL-6 & IL-11 and human LDL) under 5% O<sub>2</sub> for 5 days. From day 5 to day 7, IL-3 was increased to 10 ng/mL and IL-6 was substituted with IL-9. At day 7, dead cells were removed by using Dead Cell Removal Kit (Miltenyi), followed by the enrichment of CD61<sup>+</sup> cells using MACS separation with anti-CD61 magnetic microbeads (Miltenyi).

#### ***Isolation of human Megakaryocytic Microparticles (huMkMPs)***

MkMPs were isolated as described<sup>2,3</sup>. Briefly, cells, cell debris, and apoptotic bodies from day-12 CD34<sup>+</sup>-derived Mk culture described above, were removed by centrifugation at 1000 × g for 10 min. MkMPs were then enriched from the supernatant via ultracentrifugation (Optima Max Ultracentrifuge and Rotor TLA-55, Beckman Coulter) under 25,000 rpm for 30 min at 4 °C. After that, MkMPs were resuspended in PBS or stored at -80 °C until used.

## Supplemental Figures

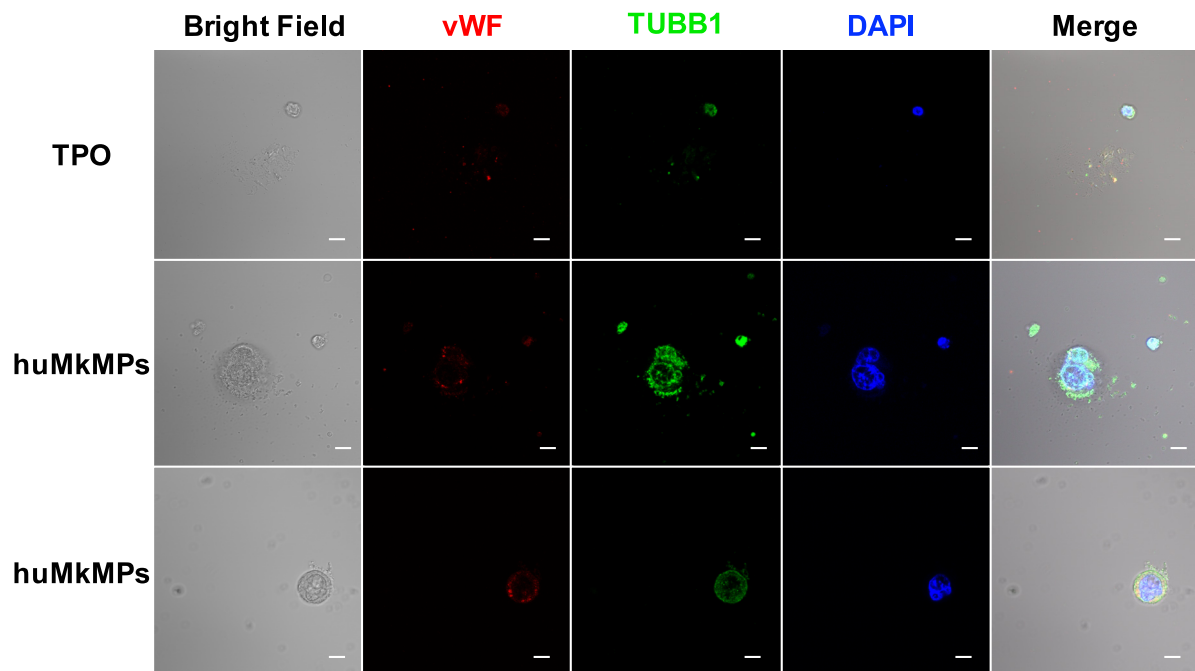

**Figure S1. Co-culture of huMkMPs with muHSPCs promotes murine megakaryopoiesis.** muHSPCs were co-cultured with either huMkMPs only, or 50 ng/ml thrombopoietin (TPO) for 5 days. Cells were harvested and fixed at day 5, stained for expression of von Willebrand Factor (vWF), beta-tubulin I (TUBB1), and nucleus (DAPI), and examined via confocal and bright-field microscopy. Scale bar = 10  $\mu$ m.

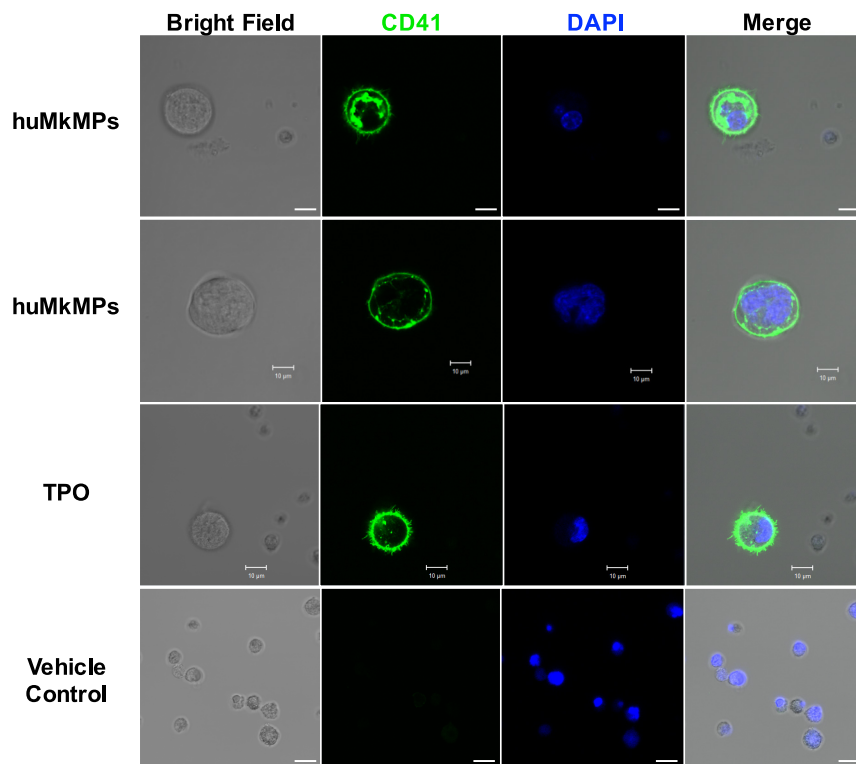

**Figure S2. Co-culture of huMkMPs with muHSPCs promotes the biogenesis of murine CD41<sup>+</sup>-cells (megakaryocytes).** muHSPCs were co-cultured with either huMkMPs only, or 50 ng/ml thrombopoietin (TPO), or without any supplements (vehicle control) for 5 days. Cells were harvested, stained with anti-CD41 antibody and examined via confocal and bright-field microscopy. Scale bar = 10  $\mu$ m.

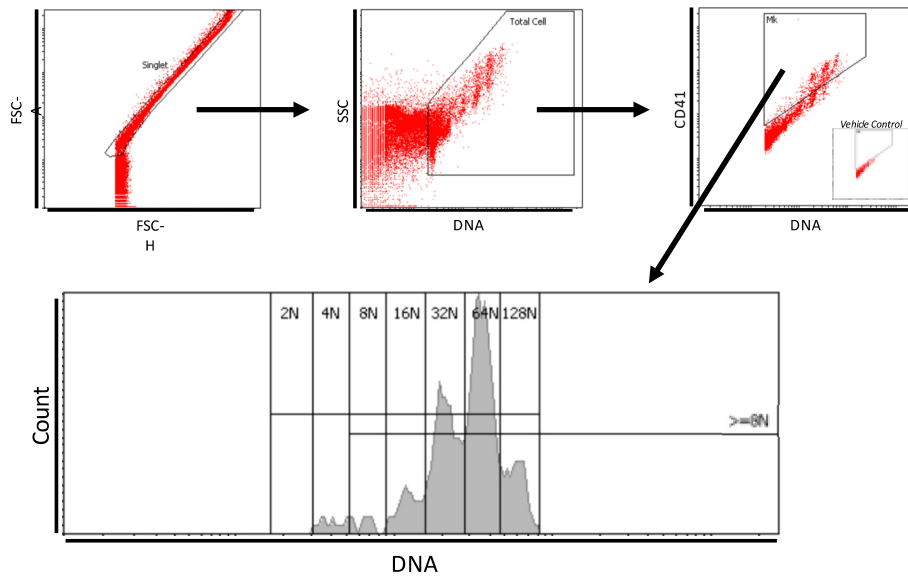

**Figure S3. Representative flow-cytometry plots for megakaryocytic ploidy analysis.** muHSPCs were cultured with 50 ng/ml thrombopoietin (TPO) for 5 day and were harvested for flow-cytometric analysis. Singlet events were first gated on the FSC-A (Forward Scatter, Area) vs. FSC-H (FSC, Height) plot, followed by gating the total cell population on the SSC (Side Scatter) vs. DNA-content plot. Megakaryocytes (Mks) were next selected based on CD41 expression on the CD41<sup>+</sup> vs. DNA-content plot. The various ploidy classes (from 2N up to 128N) of the Mk population can be visualized on a histogram of Mk-cell count vs. DNA content.

### **Supplemental References**

- [1] Panuganti, S., Schlinker, A. C., Lindholm, P. F., Papoutsakis, E. T., and Miller, W. M. (2013) Three-stage ex vivo expansion of high-ploidy megakaryocytic cells: toward large-scale platelet production, *Tissue Eng Part A* 19, 998-1014.
- [2] Jiang, J., Woulfe, D. S., and Papoutsakis, E. T. (2014) Shear enhances thrombopoiesis and formation of microparticles that induce megakaryocytic differentiation of stem cells, *Blood* 124, 2094-2103.
- [3] Jiang, J., Kao, C. Y., and Papoutsakis, E. T. (2017) How do megakaryocytic microparticles target and deliver cargo to alter the fate of hematopoietic stem cells?, *J Control Release* 247, 1-18.
